# Supplementary figures and images for: Construction of an electrochemical sensor based on the electrodeposition of Au–Pt nanoparticles mixtures on multi-walled carbon nanotubes film for voltammetric determination of cefotaxime
Source: Royal Society of Chemistry journal article supplement (doi:10.1039/c2an35182j), 2012-01-01

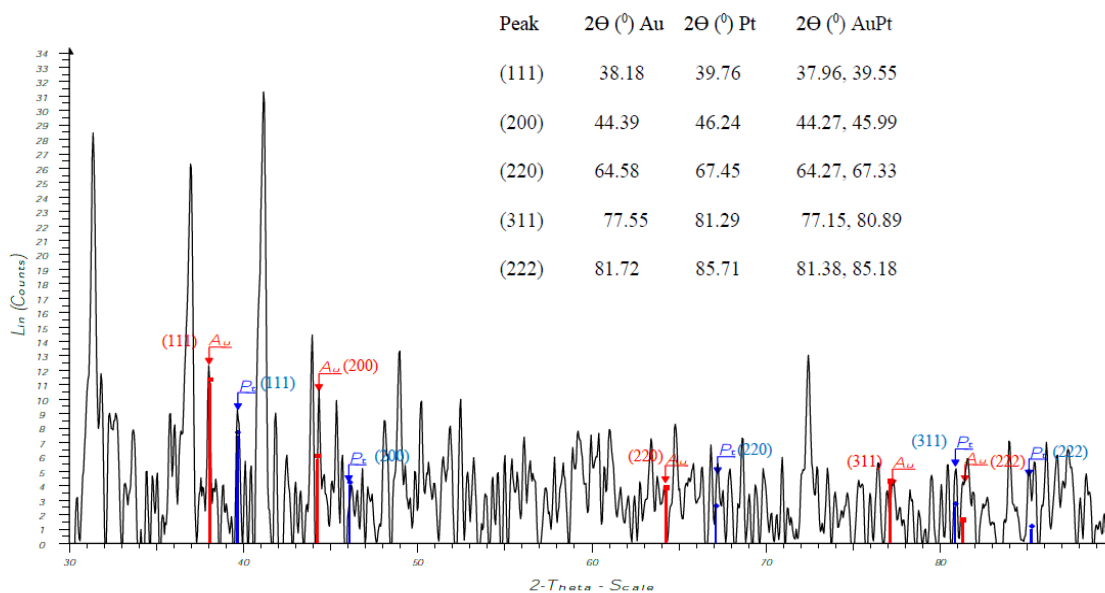

The XRD pattern of AuPt/CNT/GC

Supplement: c2an35182j.pdf [file c2an35182j.pdf]
